# Supplementary material for: Common Variants in IL-20 Gene are Associated with Subclinical Atherosclerosis, Cardiovascular Risk Factors and IL-20 Levels in the Cohort of the Genetics of Atherosclerotic Disease (GEA) Mexican Study
Source: PubMed Central journal article supplement (PMC7022804; doi:10.3390/biom10010075), 2020-01-03
Supplement: biomolecules-10-00075-s001.pdf [file biomolecules-10-00075-s001.pdf]

Table 1. Supplemental Material. Association between *IL-20* gene polymorphisms and subclinical atherosclerosis.

| SNP       | Model       | Genotypes and Alleles | Women |         | P      | OR        | 95% CI    | Men |         | P     | OR        | 95% CI    |       |      |           |
|-----------|-------------|-----------------------|-------|---------|--------|-----------|-----------|-----|---------|-------|-----------|-----------|-------|------|-----------|
|           |             |                       | SA    | Control |        |           |           | SA  | Control |       |           |           |       |      |           |
|           |             |                       | n     | n       |        |           |           | n   | n       |       |           |           |       |      |           |
| rs1400986 |             | CC                    | 53    | 202     | 0.0009 | 0.43      |           | 124 | 134     | 0.087 | 0.67      | 0.45-1.00 |       |      |           |
|           |             | CT                    | 21    | 187     |        |           |           | 66  | 106     |       |           |           |       |      |           |
|           |             | TT                    | 1     | 26      |        |           |           | 9   | 17      |       |           |           |       |      |           |
|           | codominant1 | C                     | 127   | 591     | 0.0002 | 0.44      | 0.28-0.71 | 314 | 374     | 0.036 | 0.71      | 0.52-0.97 |       |      |           |
|           |             | T                     | 23    | 239     |        |           |           | 84  | 140     |       |           |           |       |      |           |
|           | codominant2 | CC                    | 53    | 202     | 0.002  | 0.42      | 0.24-0.73 | 124 | 134     | 0.048 | 0.67      | 0.45-0.99 |       |      |           |
|           |             | CT                    | 21    | 187     |        |           |           | 66  | 106     |       |           |           |       |      |           |
|           | dominant    | CC                    | 53    | 202     | 0.036  | 0.14      | 0.01-1.10 | 124 | 134     | 0.219 | 0.57      | 0.24-1.33 |       |      |           |
|           |             | TT                    | 1     | 26      |        |           |           | 9   | 17      |       |           |           |       |      |           |
|           | recessive   | CC                    | 53    | 202     | 0.0004 | 0.39      | 0.23-0.67 | 124 | 134     | 0.029 | 0.66      | 0.45-0.96 |       |      |           |
|           |             | CT+TT                 | 22    | 213     |        |           |           | 75  | 123     |       |           |           |       |      |           |
|           | additive    | CC+CT                 | 74    | 389     | 0.046  | 0.2       | 0.03-1.51 | 190 | 240     | 0.33  | 0.67      | 0.29-1.53 |       |      |           |
| TT        |             | 1                     | 26    | 7       |        |           |           | 17  |         |       |           |           |       |      |           |
| rs1518108 |             | -                     | -     | -       | 0.0002 | 0.42      | 0.26-0.68 | -   | -       | 0.03  | 0.71      | 0.52-0.97 |       |      |           |
|           |             | CC                    | 25    | 112     |        |           |           | 54  | 69      |       |           |           | 0.089 | 1.17 | 0.75-1.82 |
|           |             | CT                    | 33    | 220     |        |           |           | 106 | 116     |       |           |           |       |      |           |
|           | TT          | 17                    | 83    | 39      | 72     |           |           |     |         |       |           |           |       |      |           |
|           | codominant1 | C                     | 83    | 444     | 0.596  | 0.89      | 0.63-1.26 | 214 | 254     | 0.204 | 0.84      | 0.64-1.09 |       |      |           |
|           |             | T                     | 67    | 386     |        |           |           | 184 | 260     |       |           |           |       |      |           |
|           | codominant2 | CC                    | 25    | 112     | 0.181  | 0.67      | 0.38-1.18 | 54  | 69      | 0.501 | 1.16      | 0.74-1.81 |       |      |           |
|           |             | CT                    | 33    | 220     |        |           |           | 106 | 116     |       |           |           |       |      |           |
|           | dominant    | CC                    | 25    | 112     | 0.864  | 0.91      | 0.46-1.80 | 54  | 69      | 0.183 | 0.69      | 0.40-1.17 |       |      |           |
|           |             | TT                    | 17    | 83      |        |           |           | 39  | 72      |       |           |           |       |      |           |
|           | recessive   | CC                    | 25    | 25      | 0.27   | 0.74      | 0.44-1.25 | 54  | 69      | 0.95  | 0.99      | 0.65-1.50 |       |      |           |
|           |             | CT+TT                 | 50    | 303     |        |           |           | 145 | 188     |       |           |           |       |      |           |
| additive  | CC+CT       | 58                    | 332   | 0.6     | 1.17   | 0.65-2.12 | 160       | 185 | 0.036   | 0.63  | 0.40-0.98 |           |       |      |           |
|           | TT          | 17                    | 83    |         |        |           | 39        | 72  |         |       |           |           |       |      |           |
|           |             | -                     | -     | -       | 0.67   | 0.93      | 0.65-1.32 | -   | -       | 0.2   | 0.84      | 0.65-1.09 |       |      |           |

Table shows the models with significant association. SA: Subclinical atherosclerosis.
